# Supplementary material for: A simple mechanical agitation method to fabricate chitin nanogels directly from chitin solution and subsequent surface modification
Source: Royal Society of Chemistry journal article supplement (doi:10.1039/c8tb03158d), 2019-01-01
Supplement: c8tb03158d1.pdf [file c8tb03158d1.pdf]

## A simple mechanical agitation method to fabricate chitin nanogels directly from chitin solution and subsequent surface modification

Jianwei Zhang<sup>a</sup>, Ping Wu<sup>b,c</sup>, Yanan Zhao<sup>b,c</sup>, Shuai Xue<sup>d</sup>, Xinyi Zhu<sup>a</sup>, Jun Tong<sup>a</sup>, Si Zheng<sup>a</sup>, Yun Chen<sup>b,c</sup>, Xiaowen Shi<sup>\*a</sup>, Hongbing Deng<sup>a</sup>

<sup>a</sup> School of Resource and Environmental Science, Hubei International Scientific and Technological Cooperation Base of Sustainable Resource and Energy, Hubei Biomass-Resource Chemistry and Environmental Biotechnology Key Laboratory, Wuhan University, Wuhan 430079, China.

<sup>b</sup> Department of Biomedical Engineering, School of Basic Medical Sciences, Wuhan University, Wuhan 430071, China.

<sup>c</sup> Hubei Province Key Laboratory of Allergy and Immune Related Diseases, Wuhan University, Wuhan 430071, China.

<sup>d</sup> Zhongnan Hospital of Wuhan University, Institute of Hepatobiliary Diseases of Wuhan University,

Transplant Center of Wuhan University Hubei Key Laboratory of Medical Technology on Transplantation, Wuhan 430071, China.

\*E-mail: [shixw@whu.edu.cn](mailto:shixw@whu.edu.cn)

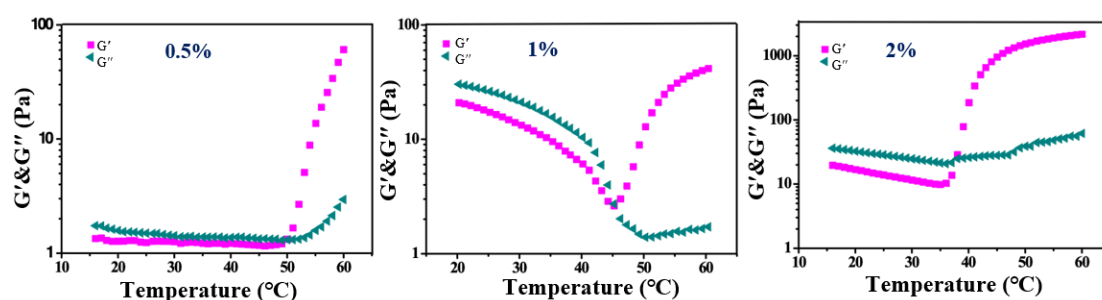

Fig. S1 Sol-gel transition temperature of chitin solution (0.5%, 1%, 2%).

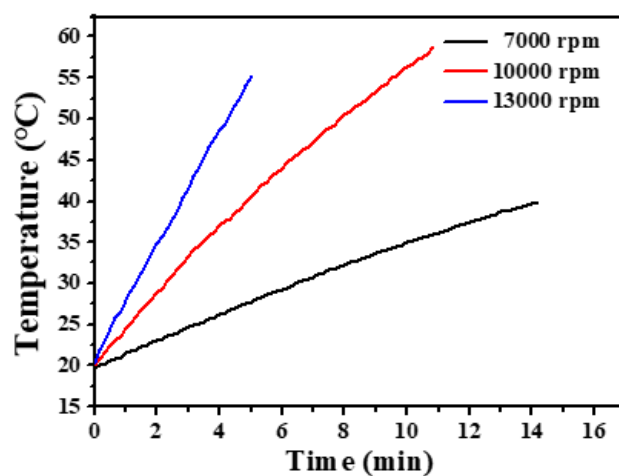

Fig.S2 The temperature increase along with time under different stirring speed.

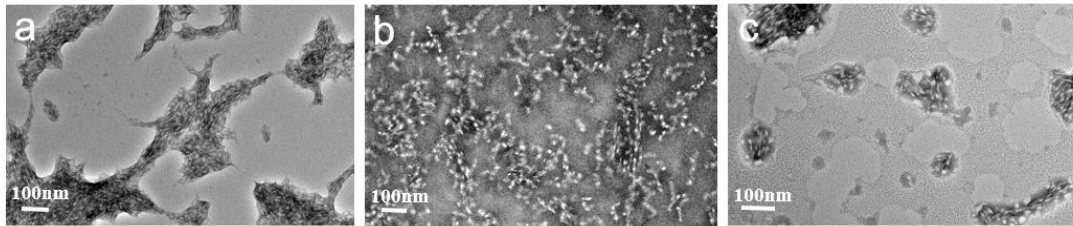

**Fig. S3** HR-TEM images of CNGs obtained under different speed of (a) 7000 rpm, (b) 10000 rpm, (c) 13000 rpm, respectively.

**Table S1** The zeta potentials at pH 7 and the yields of DE-CNGs and CO-CNGs under different conditions.

| <b>Reaction condition</b> | <b>Zeta(mV)</b> | <b>Yield(%)</b> |
|---------------------------|-----------------|-----------------|
| DE-CNGs(1h)               | 23.3            | 67.3            |
| DE-CNGs(2h)               | 24.6            | 46.8            |
| DE-CNGs(3h)               | 26.7            | 35.9            |
| CO- CNGs(5mmol)           | -23.5           | 56.3            |
| CO-CNGs(10mmol)           | -25.6           | 20              |
| CO-CNGs(15mmol)           | -49.7           | 3.6             |
